# Supplementary material for: Structure-dependent magnetoelectric and magnetothermal effects of MOF-derived zero-valence cobalt and iron oxide nanoparticles on a carbonaceous matrix
Source: Royal Society of Chemistry journal article supplement (doi:10.1039/d4cc03743j), 2024-01-01
Supplement: d4cc03743j1.pdf [file d4cc03743j1.pdf]

## Supporting Information

### Structure-dependent Magnetoelectric and Magnetothermal Effects of MOF-derived Zero-valence Cobalt and Iron Oxide Nanoparticles on Carbonaceous Matrix

Jing-Guan Liang,<sup>1,2,7</sup> Wei-Xiang Gao,<sup>1,3,7</sup> Chieh-Wei Chung,<sup>1</sup> Loise Ann Dayao,<sup>1</sup> Ho-Hsiu Chou,<sup>3</sup> Zong-Hong Lin,<sup>4</sup> Dehui Wan,<sup>1</sup> Jen-Huang Huang,<sup>3</sup> Ying-Chieh Chen,<sup>1\*</sup> Tsai-Te Lu<sup>1,5,6\*</sup>

#### Affiliations:

<sup>1</sup>Institute of Biomedical Engineering, National Tsing Hua University, Hsinchu, 30013 Taiwan.

<sup>2</sup>Department of Materials Science and Engineering, National Tsing Hua University, Hsinchu, 30013 Taiwan.

<sup>3</sup>Department of Chemical Engineering, National Tsing Hua University, Hsinchu, 30013 Taiwan.

<sup>4</sup>Department of Biomedical Engineering, National Taiwan University, Taipei, 106319 Taiwan.

<sup>5</sup>Department of Chemistry, National Tsing Hua University, Hsinchu, 30013 Taiwan.

<sup>6</sup>Department of Chemistry, Chung Yuan Christian University, Taoyuan 32023, Taiwan.

<sup>7</sup>These authors contributed equally: Mr. Jing-Guan Liang and Mr. Wei-Xiang Gao.

#### \*Corresponding author:

Ying-Chieh Chen, Ph.D., Department of Materials Science and Engineering, National Tsing Hua University, Hsinchu, 30013 Taiwan. E-mail: yisschen@mx.nthu.edu.tw

Tsai-Te Lu, Ph.D., Institute of Biomedical Engineering and Department of Chemistry, National Tsing Hua University, Hsinchu, 30013 Taiwan. E-mail: ttlu@mx.nthu.edu.tw

## Experimental Section.

**Materials.** Iron(III) nitrate nonahydrate ( $\text{Fe}(\text{NO}_3)_3 \cdot 9\text{H}_2\text{O}$ , 99%, AENCORE), 1,4-benzenedicarboxylic acid (99%, ACROS), 2-methylimidazole (ACROS), cobalt(II) nitrate hexahydrate ( $\text{Co}(\text{NO}_3)_2 \cdot 6\text{H}_2\text{O}$ , Showa), graphite flake (Alfa Aesar), and alginic acid sodium salt (Sigma-Aldrich) were used as received without further purification.

**Preparation of Fe-MIL-88B.**  $\text{Fe}(\text{NO}_3)_3 \cdot 9\text{H}_2\text{O}$  (0.404 g, 1 mmol) and 1,4-benzenedicarboxylic acid (0.166 g, 1 mmol) were dissolved in 6 mL of ethanol. After this solution was stirred at room temperature overnight, this ethanol solution was centrifuged at 6000 rpm for 10 min, which resulted in the precipitation of orange Fe-MIL-88B. After removing the supernatant solution, the obtained crude Fe-MIL-88B was washed with ethanol for three times and dried at 80 °C overnight. Then, the obtained Fe-MIL-88B was suspended in 60 mL of ethanol and stirred at 60 °C overnight. After this ethanol solution was centrifuged at 6000 rpm for 10 min and the supernatant solution was removed, the prepared Fe-MIL-88B was dried at 80 °C in a vacuum oven (yield 0.110 g).

**Preparation of MIL-88B-derived  $\text{Fe}_3\text{O}_4\text{:C}$  Microrod.** 0.100 g of Fe-MIL-88B was placed in a ceramic boat within a tube furnace and calcined under a  $\text{N}_2(\text{g})$  gas flow (200 mL/min). During the calcination process, the temperature was gradually raised from room temperature to 150 °C at a rate of 5 °C/min and then increased from 150 °C to 500 °C at a rate of 2 °C/min. Subsequently, the temperature was maintained at 500 °C for 3 h before decreased from 500 °C to room temperature at a rate of 5 °C/min, which resulted in the formation of MIL-88B-derived  $\text{Fe}_3\text{O}_4\text{:C}$  microrod (yield 0.035 g).

**Preparation of ZIF-67.** A solution of 2-methylimidazole (1.180 g, 14.4 mmol) in 12 mL of methanol was added into a 100-mL flask loaded with a methanol solution (36 mL) of  $\text{Co}(\text{NO}_3)_2 \cdot 6\text{H}_2\text{O}$  (1.047 g, 3.6 mmol). This mixture solution was stirred at room temperature for 3 min and incubated at room temperature overnight before the purple precipitates of ZIF-67 were obtained by centrifugation at 8000 rpm for 10 min. After the supernatant solution was

removed, the purple precipitates of ZIF-67 were washed with methanol for three times and dried in a vacuum oven at 80 °C overnight (yield, 0.155 g).

**Preparation of ZIF-67-derived Co@C Microparticle.** ZIF-67 (0.100 g) was loaded into a ceramic boat within a tube furnace and calcined under a N<sub>2(g)</sub> gas flow (200 mL/min). During the calcination process, the temperature was slowly increased from ambient temperature to 200 °C at a rate of 5 °C/min and maintained at 200 °C for 2 h. Then, the temperature was elevated from 200 °C to 600 °C at the same rate and kept at 600 °C for 2 h before the temperature was gradually lowered to room temperature at a rate of 5 °C/min, which resulted in the formation of ZIF-67-derived Co@C microparticles (yield 0.051 g).

**Materials Characterization.** The scanning electron microscopy (SEM), transmission electron microscopy (TEM), and high-resolution transmission electron microscopy (HRTEM) images of MIL-88B-derived Fe<sub>3</sub>O<sub>4</sub>:C microrod and ZIF-67-derived Co@C microparticles were captured using a field-emission scanning electron microscope (JEOL JSM-7000F), a transmission electron microscope (Hitachi H-7100), and a transmission electron microscope (JEM2100), respectively. PXRD patterns of MIL-88B-derived Fe<sub>3</sub>O<sub>4</sub>:C microrod and ZIF-67-derived Co@C microparticles were recorded with an X-ray diffractometer (Bruker D2 Phaser) using Cu K<sub>α</sub> radiation ( $\lambda = 1.5418 \text{ \AA}$ ). Besides, the SPXRD patterns of MIL-88B-derived Fe<sub>3</sub>O<sub>4</sub>:C microrod and ZIF-67-derived Co@C microparticles were acquired using a position-sensitive detector (MYTHEN 24K) with 20-keV X-ray ( $\lambda = 0.61992 \text{ \AA}$ ) at Taiwan Photon Source (TPS) 19A beamline of the National Synchrotron Radiation Research Center (NSRRC) in Hsinchu, Taiwan. The magnetic properties of MIL-88B-derived Fe<sub>3</sub>O<sub>4</sub>:C microrod and ZIF-67-derived Co@C microparticles were measured using a superconducting quantum interference device (SQUID, Quantum Design, US) at 300 K. The conductivity of MIL-88B-derived Fe<sub>3</sub>O<sub>4</sub>:C microrod and ZIF-67-derived Co@C microparticles was determined using a four-point probe measurement system (Sadhudesign, Taiwan). To determine the Co content in ZIF-67-derived Co@C microparticles, the ZIF-67-derived Co@C microparticles (2.5 mg) were

digested in the aqua regia (1 mL) and diluted with 9 mL of ddH<sub>2</sub>O before the Co content was analyzed using an inductively coupled plasma optical emission spectrometer (ICP-OES, Agilent 725, USA). Fe content in the MIL-88B-derived Fe<sub>3</sub>O<sub>4</sub>:C microrod was determined in a similar manner.

**Magnetothermal Properties of ZIF-67-derived Co@C Microparticle, MIL-88B-derived Fe<sub>3</sub>O<sub>4</sub>:C Microrod, and Graphite under Alternating Magnetic Field (AMF) in the Aqueous Solution with Different Viscosity.** The aqueous solution with different viscosity was prepared through loading 40 mg, 80 mg, 160 mg, and 200 mg of alginic acid sodium salt, respectively, into 2 mL of ddH<sub>2</sub>O. Then, the viscosity of 2/4/8/10 wt% sodium alginate aqueous solution was determined as 17.3/123.2/1423.9/3211.9 mPa•S using a rheometer (Anton paar, MR302e, Austria). After addition of 3 mg of ZIF-67-derived Co@C microparticle into 2 mL of 2 wt% sodium alginate<sub>(aq)</sub>, 0.5 mL of this mixture solution was transferred into a 4-mL glass tube. Using a cylindrical solenoid with a 1.1-cm diameter, an alternating magnetic field (AMF) at an output intensity of 1.60 kW (50%), generated from a high frequency generator (Power Cube 32/900), was applied to the 2 wt% sodium alginate<sub>(aq)</sub> solution loaded with 1.5 mg/mL of ZIF-67-derived Co@C microparticle. The temperature was then recorded every second over a span of 400 sec (or 480 sec and 600 sec) using an IR thermal imaging camera (Thermo Shot F30S, NEC). Magnetothermal properties of ZIF-67-derived Co@C microparticle (1.5 mg/mL), MIL-88B-derived Fe<sub>3</sub>O<sub>4</sub>:C microrod (1.5 mg/mL), and graphite (1.5 mg/mL) in the aqueous solution with different concentrations of sodium alginate (10/8/4/2 wt%) under different output intensities of AMF (1.60 kW, 50%; 0.96 kW, 30%; 0.32 kW, 10%) were measured in a similar manner.

**Magnetoelectric Properties of ZIF-67-derived Co@C Microparticle, MIL-88B-derived Fe<sub>3</sub>O<sub>4</sub>:C Microrod, and Graphite under AMF.** 40 mg of ZIF-67-derived Co@C microparticle (or MIL-88B-derived Fe<sub>3</sub>O<sub>4</sub>:C microrod and graphite) was pressed into pellet (0.9 cm in diameter) at 2000 psi using a manual hydraulic press. As shown in Figure S7, using a cylindrical

solenoid with a 1.1-cm diameter, an alternating magnetic field (AMF) at an output intensity of 1.60 kW (50%), generated from a high frequency generator (Power Cube 32/900), was applied to the pellet of ZIF-67-derived Co@C microparticle. During the intermittent application of AMF, the generated electric current was measured using a digital multimeter (PROVA 803), whereas a digital bench oscillator (Tektronix MSO44 4-BW-350, 4 Series MSO Mixed Signal Oscilloscope, 4 Channel, 350MHz) was utilized to measure the generated voltage upon application of AMF to the pellet of ZIF-67-derived Co@C microparticle. To the original V-t curve obtained upon application of AMF to the pellet of ZIF-67-derived Co@C microparticle (Figure S8a), a fast Fourier transform (FFT) process was applied using the MATLAB software to obtain the frequency spectrum. In the obtained frequency spectrum, the peak at 937330-941920 Hz lying within the range of 0.75-1.15 MHz generated by the high frequency generator was further processed using a sequential inverse fast Fourier transform (IFFT) followed by cosine function fitting by the MATLAB software, which resulted in the processed and simulated V-t curve. Magnetoelectric properties of ZIF-67-derived Co@C microparticle, MIL-88B-derived Fe<sub>3</sub>O<sub>4</sub>:C microrod, and graphite under different output intensities of AMF (1.60 kW, 50%; 0.96 kW, 30%; 0.32 kW, 10%) were measured in a similar manner.

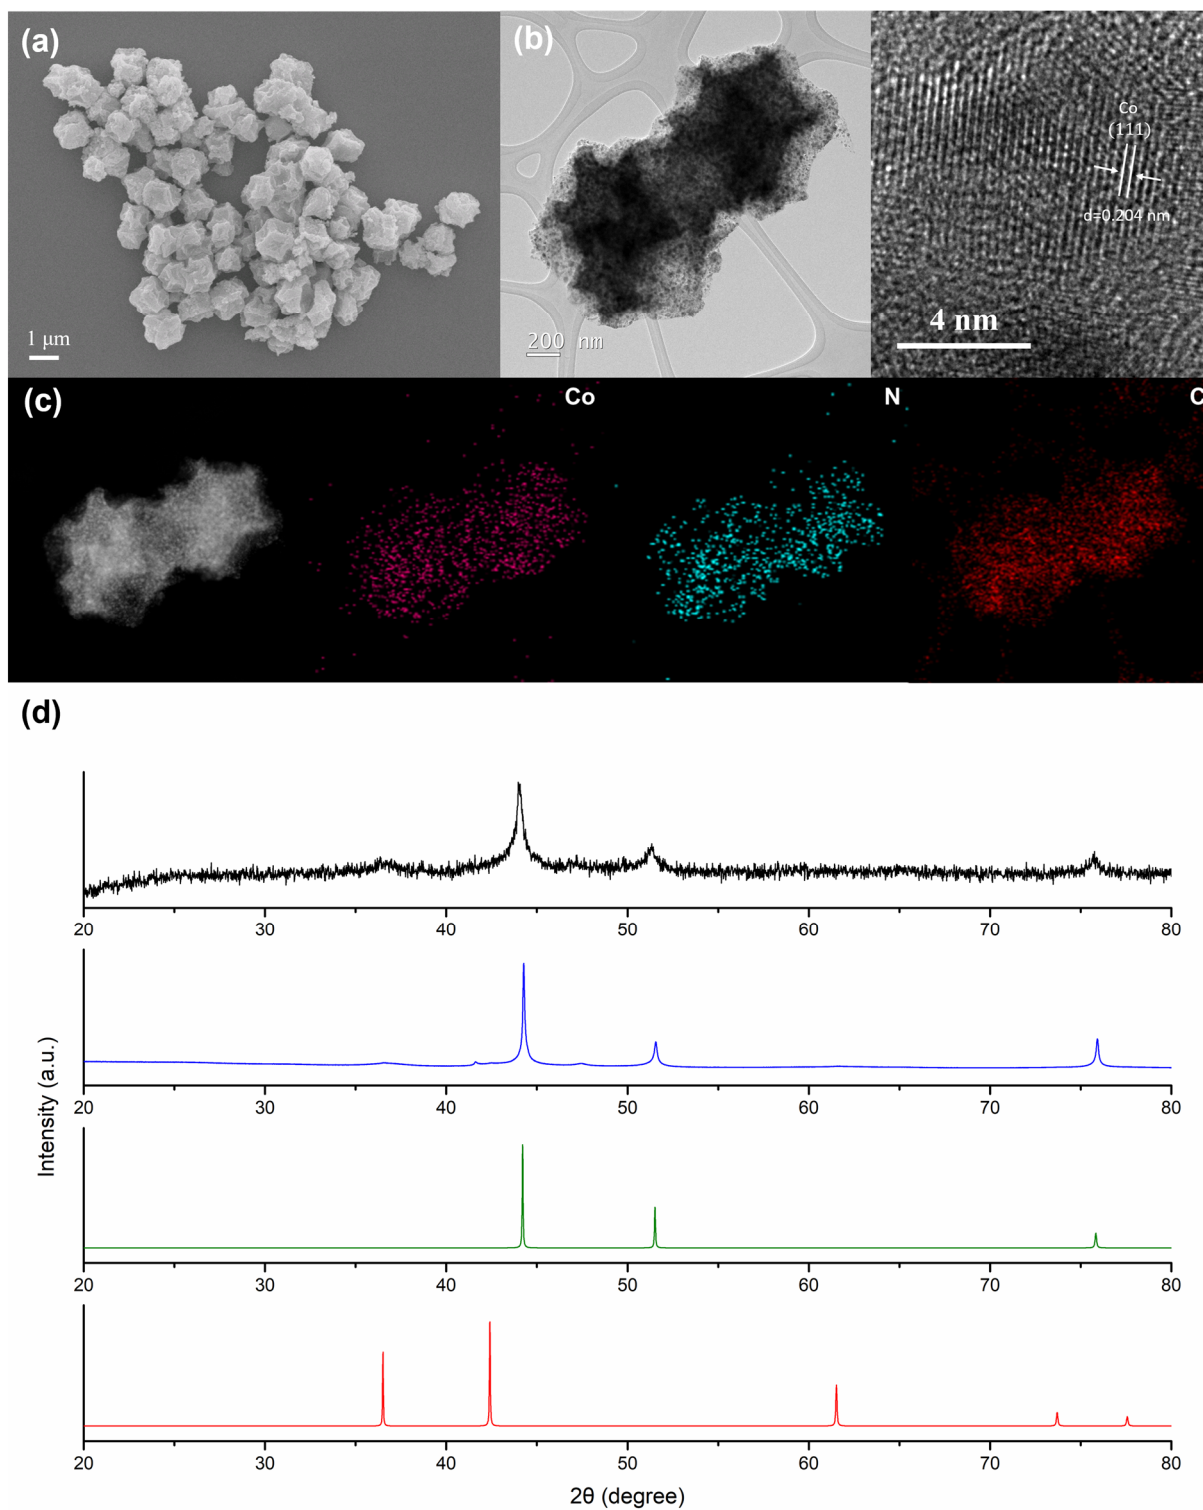

**Figure S1.** (a) SEM, (b) TEM/HRTEM, and (c) TEM together with the corresponding energy-dispersive X-ray spectroscopy (EDS) elemental mapping images of Co (pink), N (light blue), and C (red) of ZIF-67-derived Co@C microparticle. (d) PXRD (black) and SXRPD (blue) patterns of ZIF-67-derived Co@C microparticle. Simulated PXRD patterns of fcc-Co (COD #9008466) and fcc-CoO (COD #1533087) are shown in green and red, respectively.

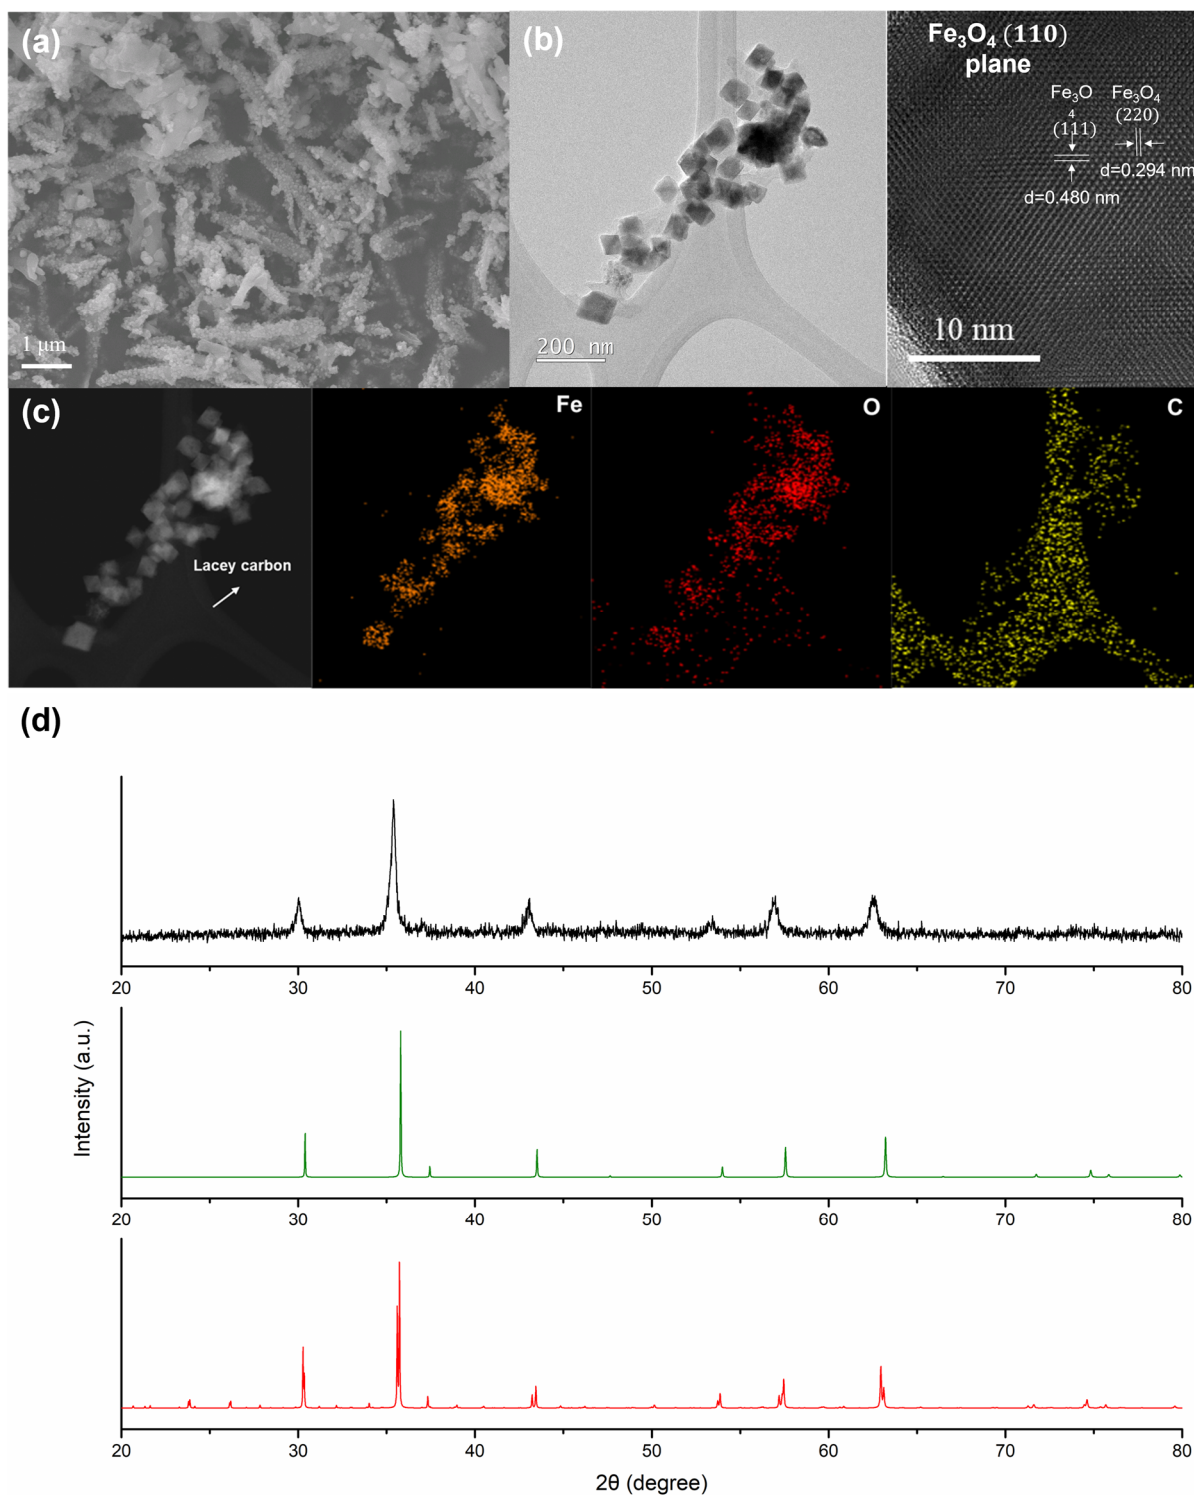

**Figure S2.** (a) SEM, (b) TEM/HRTEM, and (c) TEM together with the corresponding energy-dispersive X-ray spectroscopy (EDS) elemental mapping images of Fe (orange), O (red), and C (yellow) of MIL-88B-derived  $\text{Fe}_3\text{O}_4\text{:C}$  microrod. (d) PXRD patterns of MIL-88B-derived  $\text{Fe}_3\text{O}_4\text{:C}$  microrod (black). Simulated PXRD patterns of  $\text{Fe}_3\text{O}_4$  (COD #1011032) and  $\gamma\text{-Fe}_2\text{O}_3$  (COD #1528612) are shown in green and red, respectively.

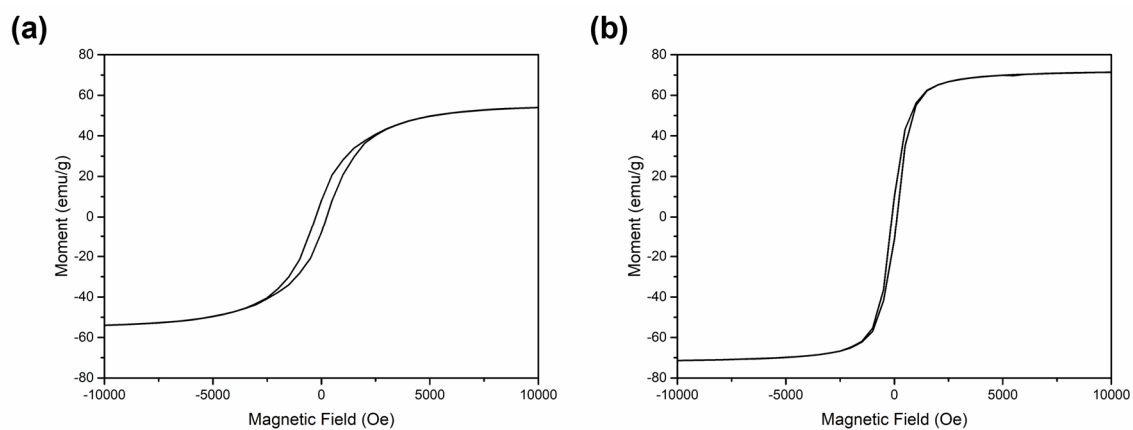

**Figure S3.** Magnetization diagrams of (a) ZIF-67-derived Co@C microparticle and (b) MIL-88B-derived Fe<sub>3</sub>O<sub>4</sub>:C microrod normalized to the weight of whole hybrid materials.



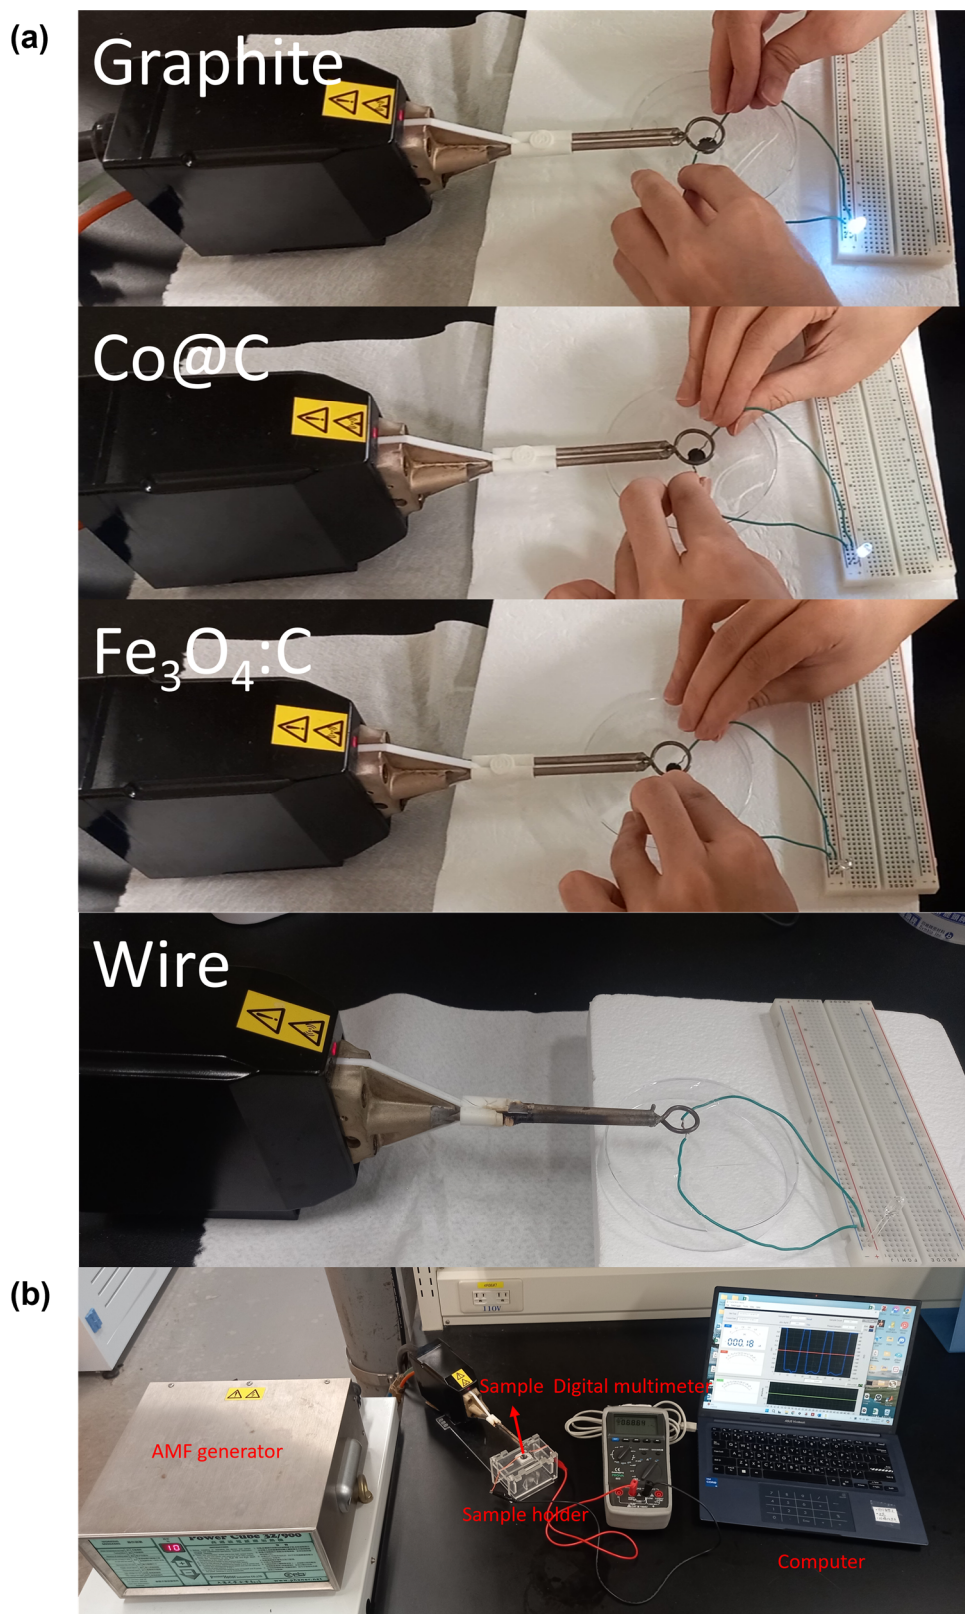

**Figure S4.** Representative images illustrating the setup for measurements on AMF-induced (a) luminous light-emitting diode (LED) and (b) I-t curves.

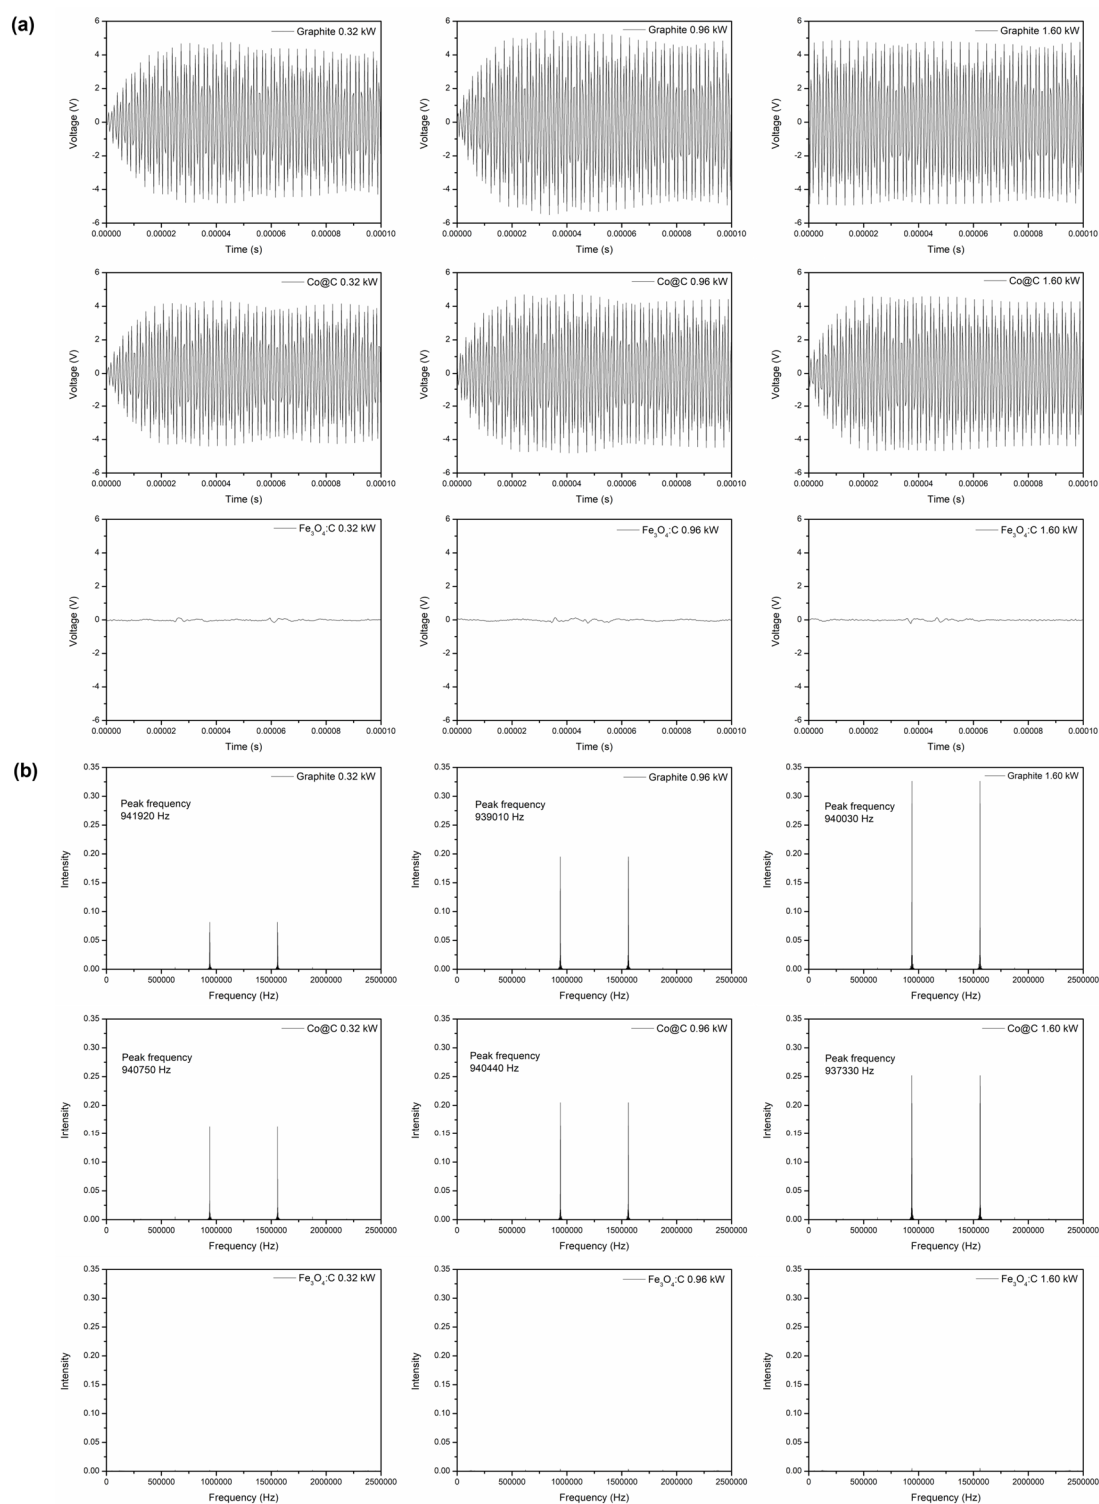

**Figure S5.** Representative (a) original V-t curves and (b) frequency spectra derived from Fast Fourier-transformed V-t curves for graphite, ZIF-67-derived Co@C microparticle, and MIL-88B-derived Fe<sub>3</sub>O<sub>4</sub>:C microrod under application of AMF at 0.32 kW, 0.96 kW, and 1.60 kW. In the frequency spectra, the peaks at 1558080-1562670 Hz are the mirror images of those at 937330-941920 Hz due to the symmetric nature of Fast Fourier transform.

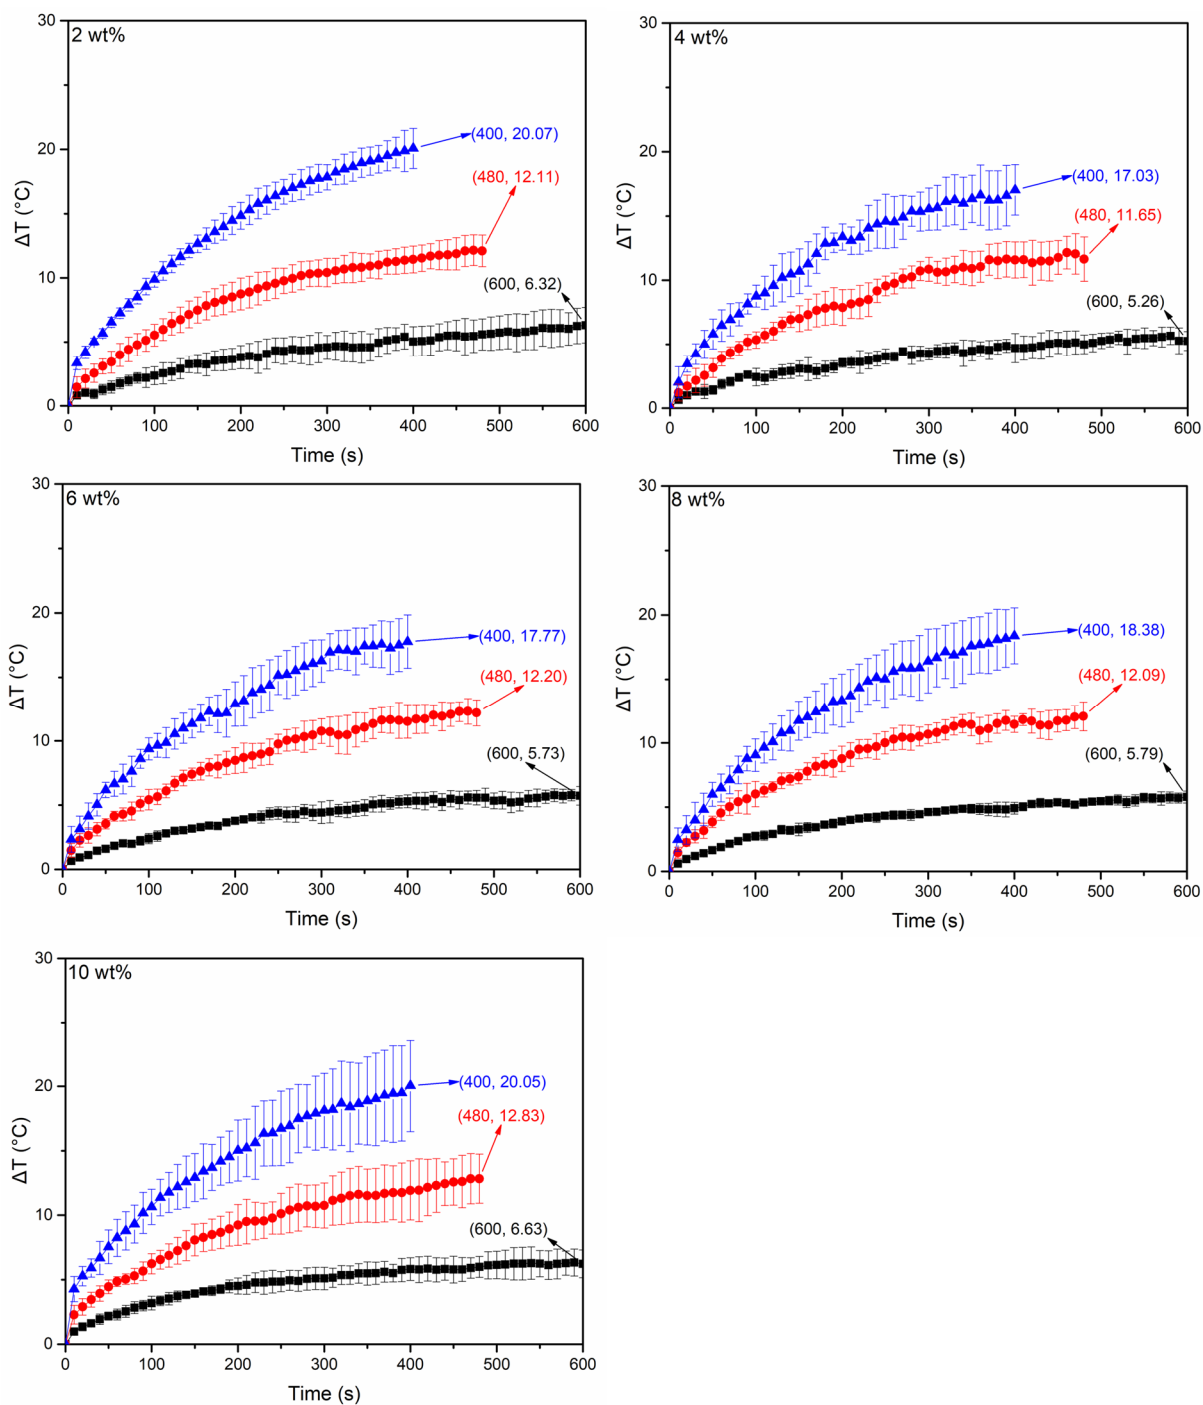

**Figure S6.** Time-dependent change of temperature upon application of AMF (10% intensity/0.32 kW, black; 30% intensity/0.96 kW, blue; 50% intensity/1.60 kW) to graphite in the aqueous solution with different concentration of sodium alginate.

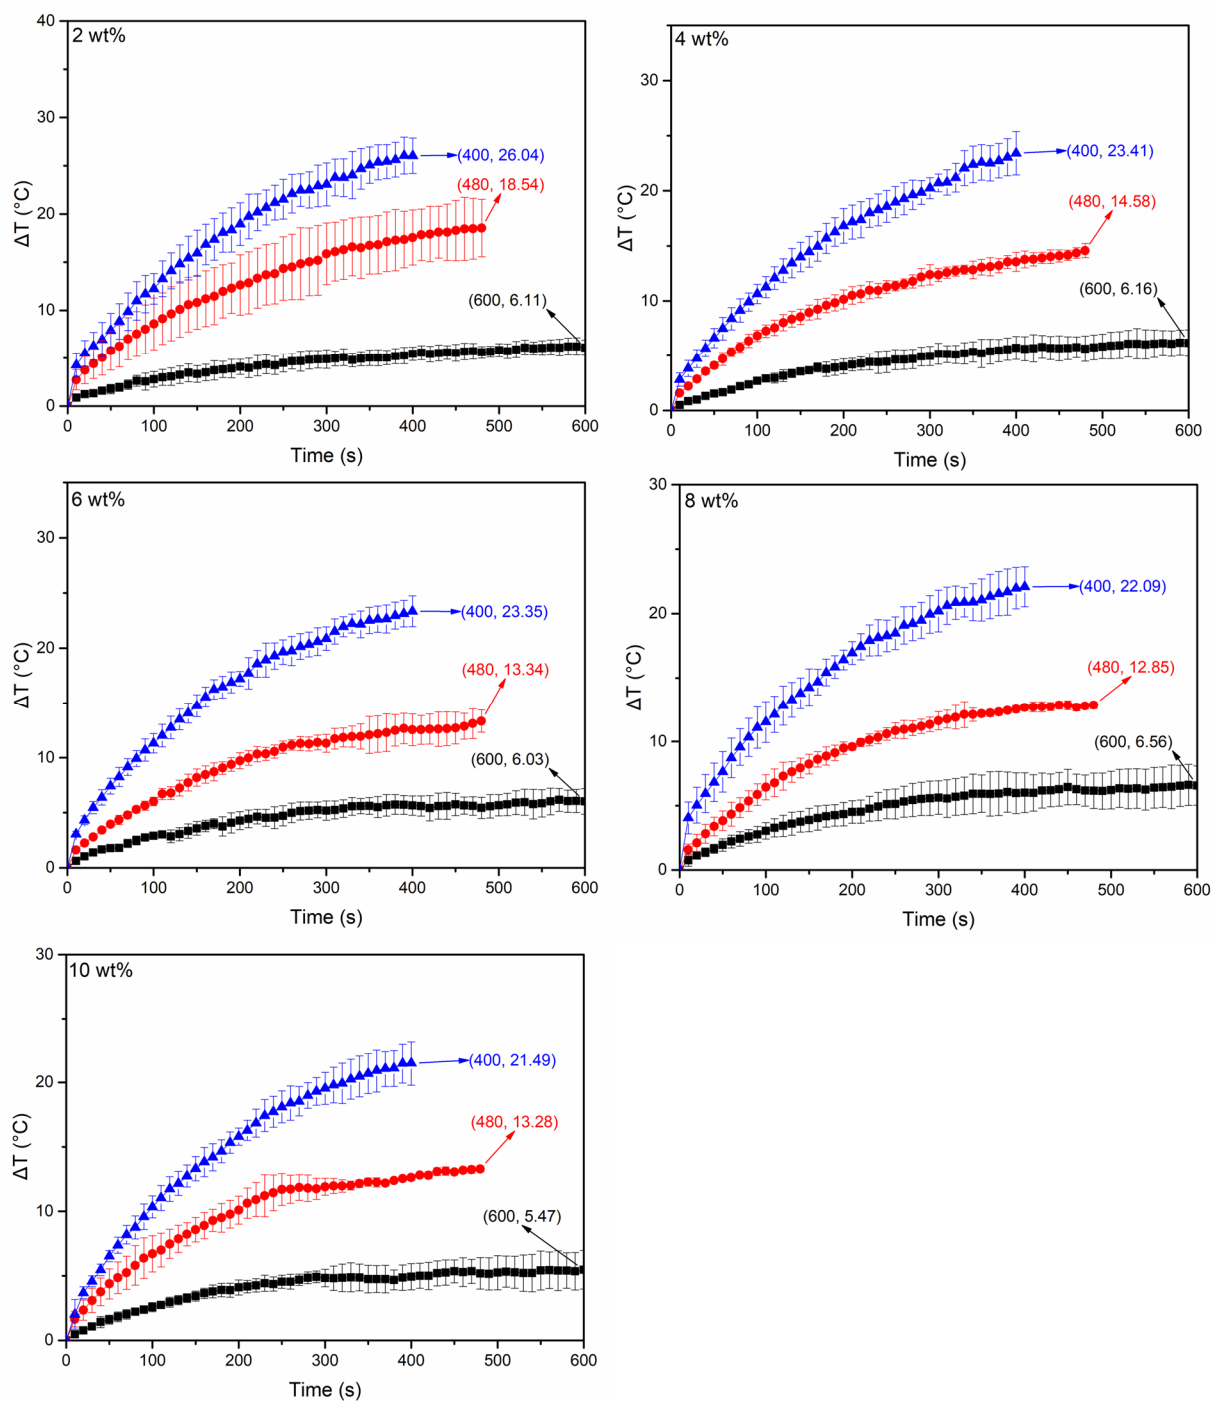

**Figure S7.** Time-dependent change of temperature upon application of AMF (10% intensity/0.32 kW, black; 30% intensity/0.96 kW, blue; 50% intensity/1.60 kW) to ZIF-67-derived Co@C microparticle in the aqueous solution with different concentration of sodium alginate.

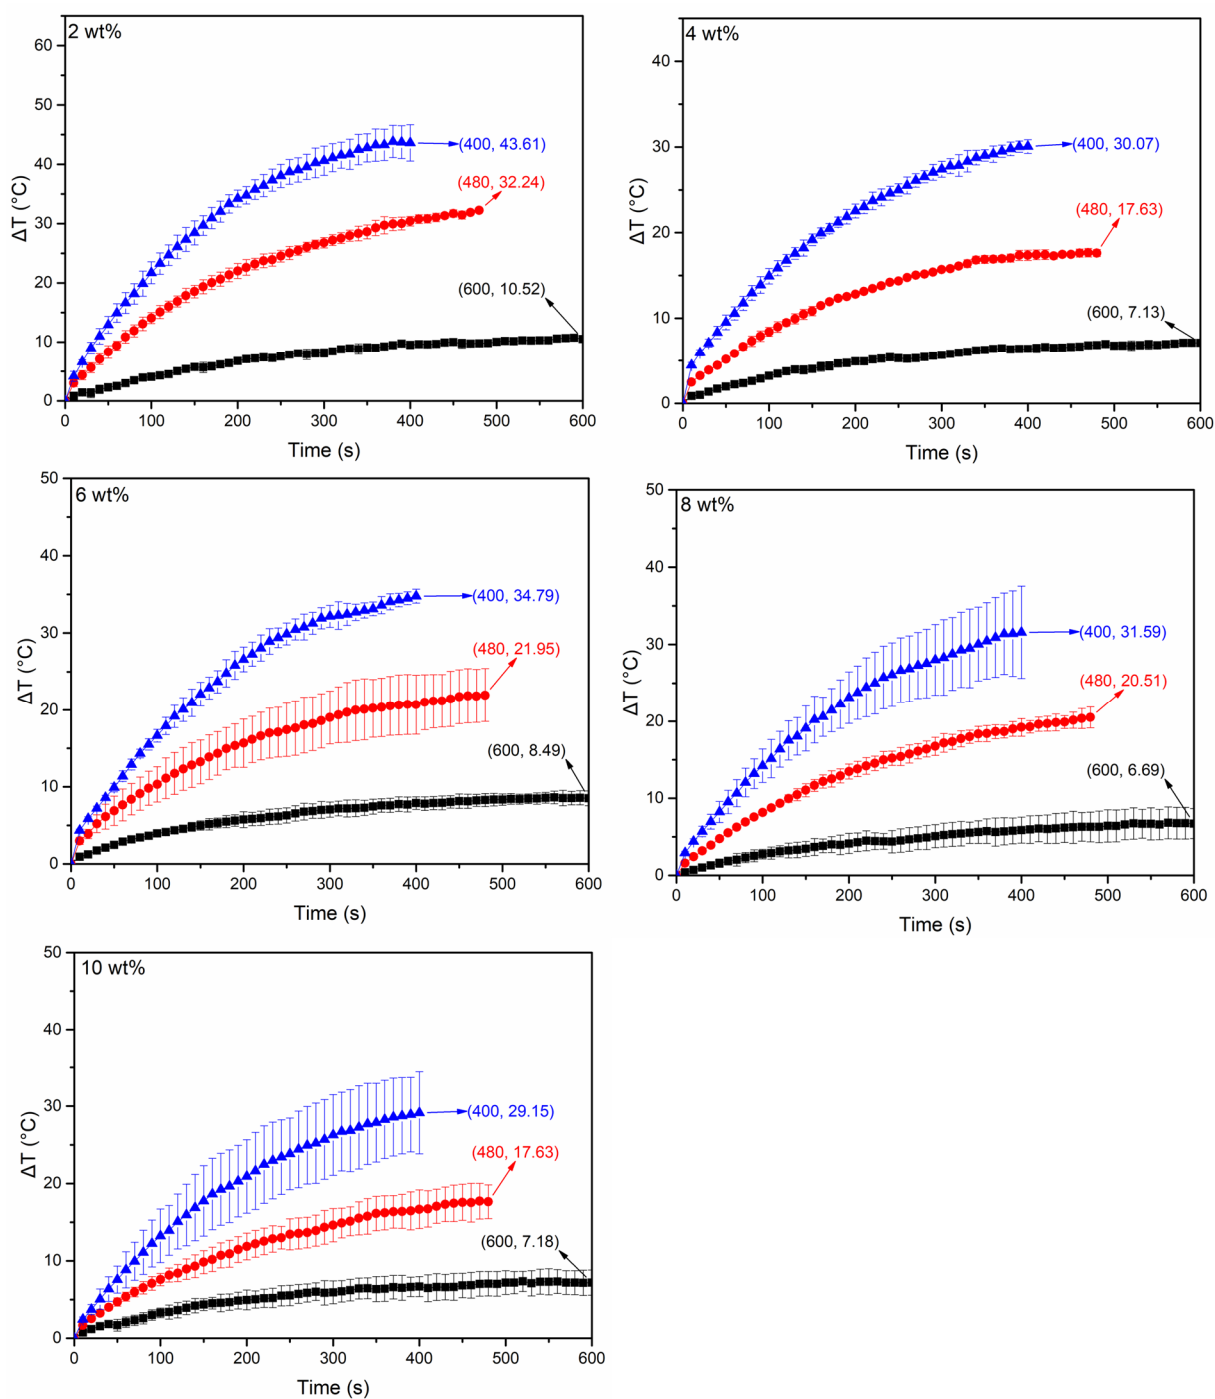

**Figure S8.** Time-dependent change of temperature upon application of AMF (10% intensity/0.32 kW, black; 30% intensity/0.96 kW, blue; 50% intensity/1.60 kW) to MIL-88B-derived  $\text{Fe}_3\text{O}_4\text{:C}$  microrod in the aqueous solution with different concentration of sodium alginate.
